# Supplementary material for: Single nuclei profiling identifies cell specific markers of skeletal muscle aging, frailty, and senescence
Source: Aging (Albany NY). 2022 Dec 13;14(23):9393–422. doi: 10.18632/aging.204435 (PMC9792217; doi:10.18632/aging.204435)
Supplement: Supplementary Table 3 [file aging-14-204435-s004.xlsx]

## Sheet: Sheet1
Supplementary Table 3. Bulk sequencing library characteristics for each sample.
Lane	Sample	Barcode sequence	PF Clusters	% of the lane	%perfect barcode	% one mismatch	Yield (Mbase)	%PF Clusters	% >= Q30 bases	Mean Quality Score
7	SM_ASA_1	CAGCGT+CGCCAT	4368518	1.29	62.56	37.44	441	100	84
7	SM_ASA_10	CGGTTA+GCACAT	3450351	1.02	61.51	38.49	348	100	84.27	35.94
7	SM_ASA_11	TTAACT+CGCGTA	3275981	0.97	71.46	28.54	331	100	83.71	35.79
7	SM_ASA_12	ATGAAC+GATTAT	3588211	1.06	77.66	22.34	362	100	84.77	36.06
7	SM_ASA_13	CCTAAG+ATGACC	3524515	1.04	81.65	18.35	356	100	84.36	35.94
7	SM_ASA_14	AATCCG+CTGATA	3207987	0.95	79.83	20.17	324	100	83.69	35.8
7	SM_ASA_15	GGCTGC+TCACGG	3358471	0.99	70.46	29.54	339	100	84	35.88
7	SM_ASA_16	TACCTT+TATTGG	3627306	1.07	70.6	29.4	366	100	81.9	35.37
7	SM_ASA_17	TCTTAA+GAATTG	2907206	0.86	76.33	23.67	294	100	83.81	35.81
7	SM_ASA_18	GTCAGG+ATTCCG	3076213	0.91	72.39	27.61	311	100	84.06	35.9
7	SM_ASA_19	ATACTG+CTGCGC	2168779	0.64	76.37	23.63	219	100	82.93	35.6
7	SM_ASA_2	TTCGAG+GCAGTA	1980697	0.58	73.58	26.42	200	100	84.71	36.05
7	SM_ASA_20	TATGTC+CGAAAA	2708746	0.8	76.42	23.58	274	100	83.4	35.74
7	SM_ASA_21	GAGTCC+TCGTGT	3132150	0.92	55.89	44.11	316	100	84.39	35.98
7	SM_ASA_22	GGAGGT+AGTACA	3655278	1.08	46.08	53.92	369	100	84.43	36
7	SM_ASA_23	CACACT+GACGTC	3728062	1.1	66.29	33.71	377	100	84.48	35.95
7	SM_ASA_24	CCGCAA+TCCGAT	4363921	1.29	82.9	17.1	441	100	85.15	36.12
7	SM_ASA_25	TTTATG+GAGTCC	2774632	0.82	71.74	28.26	280	100	83.89	35.84
7	SM_ASA_26	AACGCC+AGACTA	4293840	1.27	82.97	17.03	434	100	85.39	36.2
7	SM_ASA_27	CAAGCA+ATTAAT	3784157	1.12	78.74	21.26	382	100	85.62	36.27
7	SM_ASA_28	GCTCGA+TCCCTA	4205216	1.24	78.05	21.95	425	100	85.15	36.15
7	SM_ASA_29	GCGAAT+CTCGGT	3287769	0.97	63.95	36.05	332	100	83.64	35.77
7	SM_ASA_3	ACCAGT+GCAACG	3320448	0.98	67.97	32.03	335	100	83.25	35.68
7	SM_ASA_30	TGGATT+GAGAGG	3360788	0.99	62.88	37.12	339	100	84.15	35.92
7	SM_ASA_31	ACCTAC+CCTTAG	3753591	1.11	82.58	17.42	379	100	84.64	36
7	SM_ASA_32	CGAAGG+CGACCC	3373047	1	80.63	19.37	341	100	84.17	35.9
7	SM_ASA_33	AGATAG+ATGTGG	2878757	0.85	70.92	29.08	291	100	84.46	35.99
7	SM_ASA_34	TTGGTA+CTCAAC	2963090	0.87	69.93	30.07	299	100	84.2	35.94
7	SM_ASA_35	GTTACC+TCTCCT	2343931	0.69	71.37	28.63	237	100	83.32	35.72
7	SM_ASA_36	CGCAAC+CGGCTG	3394612	1	84.5	15.5	343	100	84.25	35.9
7	SM_ASA_37	TGGCGA+GCCTTT	3613744	1.07	77.59	22.41	365	100	84.01	35.89
7	SM_ASA_38	ACCGTG+TACGCA	2740241	0.81	66.21	33.79	277	100	83.49	35.76
7	SM_ASA_39	CAACAG+GATATA	2644560	0.78	80.62	19.38	267	100	83.93	35.85
7	SM_ASA_4	TGCACG+TAGGGC	3807174	1.12	78.22	21.78	385	100	84.15	35.91
7	SM_ASA_40	GATTGT+AGAAGC	2828137	0.83	60.31	39.69	286	100	83.8	35.85
7	SM_ASA_41	CTCTCG+TCATAA	3284503	0.97	70.86	29.14	332	100	84.5	36
7	SM_ASA_42	TGACAC+CGAGGG	4129240	1.22	84.88	15.12	417	100	84.84	36.06
7	SM_ASA_43	AAGACA+ATCGAG	3769882	1.11	83.18	16.82	381	100	85.53	36.24
7	SM_ASA_44	ACAGAT+GACACT	3500313	1.03	67.83	32.17	354	100	85.03	36.11
7	SM_ASA_45	TAGGCT+CGTATC	2646661	0.78	64.84	35.16	267	100	83.73	35.83
7	SM_ASA_46	CTCCAT+TAACTC	4777018	1.41	71.05	28.95	482	100	84.24	35.92
7	SM_ASA_47	GCATGG+CTAACT	3111116	0.92	69.17	30.83	314	100	84	35.89
7	SM_ASA_48	AATAGC+GCGCGA	3657528	1.08	83.15	16.85	369	100	84.9	36.07
7	SM_ASA_49	GTGCCA+TCAGCC	3326775	0.98	73.44	26.56	336	100	84.26	35.94
7	SM_ASA_5	ACATTA+TAGCCG	3537139	1.04	74.83	25.17	357	100	83.94	35.84
7	SM_ASA_50	TCGAGG+GAAAAC	3307300	0.98	78.44	21.56	334	100	84.34	35.96
7	SM_ASA_51	CACTAA+TACCGT	3490094	1.03	79.69	20.31	352	100	84.64	36
7	SM_ASA_52	GGTATA+AGTGTG	3341617	0.99	63.57	36.43	338	100	84.63	36.03
7	SM_ASA_53	CGCCTG+CTTTCC	4008417	1.18	73.24	26.76	405	100	84.24	35.93
7	SM_ASA_54	AATGAA+AGGCCT	3329803	0.98	75.79	24.21	336	100	84.36	35.96
7	SM_ASA_55	ACAACG+CTGGCG	3751893	1.11	83.49	16.51	379	100	84.54	35.97
7	SM_ASA_56	ATATCC+GCCAAA	3007713	0.89	71.03	28.97	304	100	83.51	35.74
7	SM_ASA_57	AGTACT+ATCAGA	3682400	1.09	69.69	30.31	372	100	84.14	35.91
7	SM_ASA_58	ATAAGA+TCGGTG	3380249	1	73.89	26.11	341	100	83.16	35.63
7	SM_ASA_59	GGTGAG+CGCTGC	3667445	1.08	67.4	32.6	370	100	83.69	35.8
7	SM_ASA_6	GTGTAG+GCTGAC	3163174	0.93	66.01	33.99	319	100	84.25	35.93
7	SM_ASA_60	TTCCGC+TCAATT	3965978	1.17	79.17	20.83	401	100	84.19	35.92
7	SM_ASA_61	GAAGTG+GAACCA	2419564	0.71	62.89	37.11	244	100	83.59	35.79
7	SM_ASA_62	CAATGC+CGATTT	3541425	1.05	79.17	20.83	358	100	84.95	36.11
7	SM_ASA_63	ACGTCT+TCGCAC	2534996	0.75	61.73	38.27	256	100	82.03	35.4
7	SM_ASA_64	CAGGAC+GATGCG	3723512	1.1	78.83	21.17	376	100	84.23	35.92
7	SM_ASA_65	AAGCTC+CTTCTT	3266820	0.96	70.16	29.84	330	100	84.33	35.96
7	SM_ASA_66	GACGAT+GACTGA	4021770	1.19	64.11	35.89	406	100	84.55	36.01
7	SM_ASA_67	TCGTTC+ATAGCA	3307083	0.98	64.88	35.12	334	100	83.87	35.86
7	SM_ASA_68	CCAATT+CGGGAC	4003732	1.18	69.02	30.98	404	100	84.51	35.97
7	SM_ASA_69	AGTTGA+TGTAAG	3749220	1.11	76.52	23.48	379	100	85.31	36.21
7	SM_ASA_7	CTAGTC+AGCATT	3443437	1.02	73.84	26.16	348	100	82.9	35.61
7	SM_ASA_70	AACCGA+GCTAGT	3995461	1.18	83.43	16.57	404	100	85.03	36.1
7	SM_ASA_71	CAGATG+AGCTAA	3774611	1.11	71.57	28.43	381	100	84.9	36.09
7	SM_ASA_72	GTAGAA+TACATG	3819370	1.13	73.46	26.54	386	100	85.26	36.19
7	SM_ASA_73	GACATC+GCTCTG	3326704	0.98	73.89	26.11	336	100	84.67	36.03
7	SM_ASA_74	CGATCT+TAATCT	3228424	0.95	59.83	40.17	326	100	84.27	35.96
7	SM_ASA_75	CGTCGC+TAGTTA	4051254	1.2	78.68	21.32	409	100	84.42	35.98
7	SM_ASA_76	ATGGCG+CTCCCA	3489886	1.03	75.35	24.65	352	100	84.31	35.96
7	SM_ASA_77	ATTGGT+AGCCGG	2992876	0.88	64.75	35.25	302	100	83.48	35.75
7	SM_ASA_78	GCCACA+CTACAG	3889289	1.15	84.45	15.55	393	100	84.9	36.07
7	SM_ASA_79	CATCTA+GAAGGT	2865727	0.85	70.6	29.4	289	100	83.57	35.76
7	SM_ASA_8	TGTGCA+CTATGA	3007760	0.89	75.4	24.6	304	100	79.95	34.91
7	SM_ASA_80	AACAAG+ATGGTT	4363877	1.29	76.19	23.81	441	100	85.6	36.25
7	SM_ASA_81	GCAGCC+TATCAA	2888685	0.85	74.8	25.2	292	100	84	35.88
7	SM_ASA_9	TCAGGA+AGCGCC	3812634	1.13	78.45	21.55	385	100	83.7	35.79
