# Supplementary material for: Single nuclei profiling identifies cell specific markers of skeletal muscle aging, frailty, and senescence
Source: Aging (Albany NY). 2022 Dec 13;14(23):9393–422. doi: 10.18632/aging.204435 (PMC9792217; doi:10.18632/aging.204435)
Supplement: Supplementary Tables 1 and 2 [file aging-14-204435-s003.pdf]

## SUPPLEMENTARY TABLES

**Supplementary Table 1. Mean (standard deviation) values for clinical parameters in the bulk cohort.**

|                       | Old healthy <i>N</i> = 29 | Frail <i>N</i> = 24 | Young <i>N</i> = 19 |
|-----------------------|---------------------------|---------------------|---------------------|
| Age                   | 72.4 (7.07)               | 76.9 (7.44)         | 22.1 (2.95)         |
| 6 min walk test (m/s) | 1.10 (0.22)               | 0.97 (0.23)         | 1.19 (0.24)         |
| Peak Torque (Nm)      | 196 (41.4)                | 145 (30.7)          | 290 (69.6)          |
| Time Up and Go (sec)  | 7.56 (1.35)               | 8.80 (2.05)         | 6.08 (0.87)         |
| SPPB Total            | 11.1 (1.03)               | 9.61 (1.95)         | 12.0 (0.00)         |
| Grip Strength         | 43.2 (8.54)               | 37.5 (8.85)         | 50.0 (9.89)         |
| Biodex                | 142 (31.0)                | 112 (28.9)          | 176 (35.5)          |

**Supplementary Table 2. Assessment of changes in bulk RNA-seq with clinical parameters.**

| Parameter       | Up                                     | Down                                        |
|-----------------|----------------------------------------|---------------------------------------------|
| SPPB            | RPL10P9, CGA, MAP7D2                   |                                             |
| Grip Strength   | PPBP, SPAM1, SPATA17, LRRC65           |                                             |
| Time Up and Go  | RPL10P9, GRP20, PPFA3, IGFN1, GAS2L2   | MTRNRL8, MTND4P24                           |
| 6 min Walk Test | MTCYBP35, PP2R2B, CDK18, S100A2, CAMD5 |                                             |
| Biodex          | GPR61, MAP7D2                          | COL19A1, MYCL, LMO2, MPZL2, PNPLA3, SLC47A2 |
| Leg Press       |                                        | PAX5, COL25A1, NPTX1, PNPLA3                |

Analysis of old vs. frail samples only. Clinical factors were binarized to good and bad performers if they were above or below the median. DEGs between good and bad performers are shown for 6min walk test, SPPB, 'Time up and Go', grip strength, Biodex and leg press with *P*-value < 0.01, abs (logFC) >2 are shown.
